# Supplementary material
Source: publisher site journal article supplement (https://www.dovepress.com/article/296253)

**Supplementary Figure 1**

Figure legend: Tumor images before and after treatment.


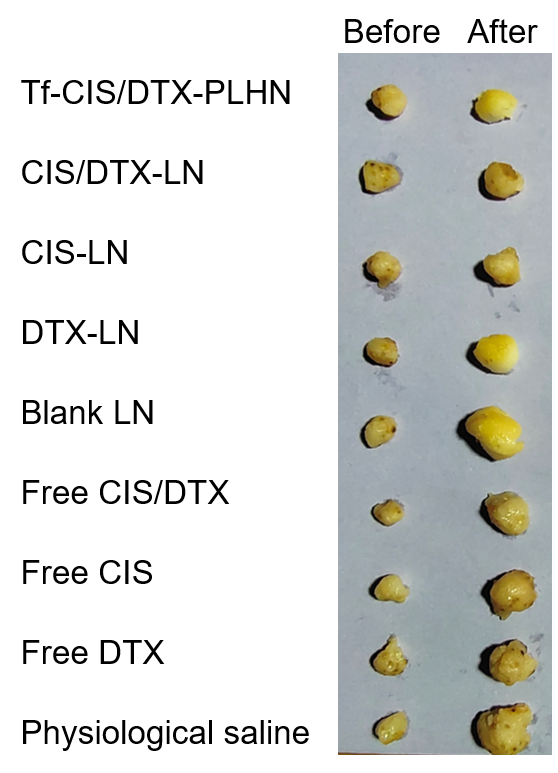

Supplement: Supplementary file 1 [file get_supplementary_file.php]
